# Supplementary material for: Phytochemical Profiling of the Ethanolic Extract of Zaleya pentandra L. Jaffery and Its Biological Activities by In-Vitro Assays and In-Silico Molecular Docking
Source: MDPI journal article supplement (doi:10.3390/app13010584), 2022-12-31
Supplement: s1 [file s1]

## Article

# Phytochemical Profiling of the Ethanolic Extract of *Zaleya pentandra* L. Jaffery and Its Biological Activities by In-Vitro Assays and In-Silico Molecular Docking

Afia Shahid <sup>1</sup>, Kashif ur Rehman Khan <sup>1,\*</sup>, Huma Rao <sup>1</sup>, Hanan Y. Aati <sup>2</sup>, Asmaa E. Sherif <sup>3,4</sup>, Duraiz Ahmed Khan <sup>1</sup>, Abdul Basit <sup>1,5</sup>, Muhammad Umair <sup>6</sup>, Abdul Mueed <sup>7</sup>, Tuba Esatbeyoglu <sup>8,\*</sup> and Sameh A. Korma <sup>9,10</sup>

<sup>1</sup> Department of Pharmaceutical Chemistry, Faculty of Pharmacy, The Islamia University of Bahawalpur, Bahawalpur 63100, Pakistan

<sup>2</sup> Department of Pharmacognosy, College of Pharmacy, King Saud University, Riyadh 11495, Saudi Arabia

<sup>3</sup> Department of Pharmacognosy, College of Pharmacy, Prince Sattam bin Abdul Aziz University, Alkharj 11942, Saudi Arabia

<sup>4</sup> Department of Pharmacognosy, Faculty of Pharmacy, Mansoura University, Mansoura 35516, Egypt

<sup>5</sup> Department of Pharmaceutical Chemistry, Faculty of Pharmaceutical Sciences, Prince of Songkla University, Hat Yai 90112, Songkla, Thailand

<sup>6</sup> College of Pharmacy, Shenzhen Technology University, Shenzhen 518060, China

<sup>7</sup> State Key Laboratory of Food Science and Technology, Nanchang University, Nanchang 330047, China

<sup>8</sup> Department of Food Development and Food Quality, Institute of Food Science and Human Nutrition, Gottfried Wilhelm Leibniz University Hannover, Am Kleinen Felde 30, 30167 Hannover, Germany

<sup>9</sup> Department of Food Science, Faculty of Agriculture, Zagazig University, Zagazig 44519, Egypt

<sup>10</sup> School of Food Science and Engineering, South China University of Technology, Guangzhou 510641, China

\* Correspondence: kashifur.rahman@iub.edu.pk (K.u.R.K.); esatbeyoglu@lw.uni-hannover.de (T.E.); Tel.: +92-33-6670-8638 (K.u.-R.K.); +49-51-1762-5589 (T.E.)



**Table S2.** Toxicity studies (PROTOX II) results of the best docked compounds.

| Sr No. | Best Docked Compounds                            | LD <sub>50</sub><br>mg/kg | Predicted Class | Hepatotoxic | Carcinogenic | Immunotoxic | Mutagenic | Cytotoxic |
|--------|--------------------------------------------------|---------------------------|-----------------|-------------|--------------|-------------|-----------|-----------|
| 1      | 2-Hydroxy-n-(2-phenylethyl)benzamide             | 2530                      | 5               | -           | -            | -           | -         | -         |
| 2      | 1,2-Benzenedicarboxylic acid                     | 1000                      | 4               | Inactive    | Inactive     | Inactive    | Inactive  | Inactive  |
| 3      | [1,3] Diazepan-2,4-dione                         | 1600                      | 4               | Inactive    | Inactive     | Inactive    | Inactive  | Inactive  |
| 4      | Lactose                                          | 10000                     | 6               | Inactive    | Inactive     | Inactive    | Inactive  | Inactive  |
| 5      | Tricyclo[4.3.1.1(3,8)]undecane-1-carboxylic acid | 1000                      | 4               | Inactive    | Inactive     | Inactive    | Inactive  | Inactive  |
| 6      | Cis-(-)-carvone-5,6-oxide                        | 5000                      | 5               | Inactive    | Inactive     | Inactive    | Inactive  | Inactive  |
| 7      | Phthalic acid, bis-7-methyloctyl ester           | 1340                      | 4               | Inactive    | Active       | Inactive    | Inactive  | Inactive  |
| 8      | $\gamma$ -Sitosterol                             | 890                       | 4               | Inactive    | Inactive     | Active      | Inactive  | Inactive  |
| 9      | Diethyl phthalate                                | 1340                      | 4               | Inactive    | Active       | Inactive    | Inactive  | Inactive  |

**Class I:** (LD<sub>50</sub> less than equals to 5), **Class II:** (LD<sub>50</sub> greater than 5 but less than equals to 50), **Class III:** (LD<sub>50</sub> greater than 50 but less than equals to 300), **Class IV:** (LD<sub>50</sub> greater than 300 but less than equals to 2000), **Class V:** (LD<sub>50</sub> Greater than 2000 but less than equals to 5000), **Class VI:** LD<sub>50</sub> (greater than 5000).
